# Supplementary material for: Artificial Intelligence Reveals Distinct Prognostic Subgroups of Muscle-Invasive Bladder Cancer on Histology Images
Source: Research Square preprint supplement (doi:10.21203/rs.3.rs-3151281/v1), 2023-07-20
Supplement: Supplementary file 1 [file 5c0e0cbccd61d57b3639d306.docx]

Supplementary Tables for “Artificial Intelligence Reveals Distinct Prognostic Subgroups of Muscle-Invasive Bladder Cancer on Histology Images”

Table of Contents

[Signature list 3](#_Toc126799661)

[microRNA cluster 6](#_Toc126799662)

[mutation in TSC1 6](#_Toc126799663)

[mRNA cluster 7](#_Toc126799664)

[mutation in FGFR3 7](#_Toc126799665)

[lncRNA cluster 7](#_Toc126799666)

[mutation in ERBB3 7](#_Toc126799667)

[mutation in FAT1 7](#_Toc126799668)

[mutation in PIK3CA 8](#_Toc126799669)

[mutation in KANSL1 8](#_Toc126799670)

[mutation in TMCO4 9](#_Toc126799671)

[mutation in KDM6A 9](#_Toc126799672)

[mutation in METTL3 9](#_Toc126799673)

[Squamous pathology 9](#_Toc126799674)

[mutation in PSIP1 9](#_Toc126799675)

[mutation in ZNF773 9](#_Toc126799676)

[Hypomethylation cluster 9](#_Toc126799677)

[mutation in GNA13 10](#_Toc126799678)

# Signature list

| No. | Signature |
| --- | --- |
| 1 | Pathology classification |
| 2 | Pathology abbreviated |
| 3 | Inflammatory Infiltrate Response |
| 4 | Squamous pathology |
| 5 | Neuroendocrine pathology |
| 6 | Plasmacytoid pathology |
| 7 | NOS pathology |
| 8 | mRNA cluster |
| 9 | Hypermethylation cluster |
| 10 | Hypomethylation cluster |
| 11 | microRNA cluster |
| 12 | lncRNA cluster |
| 13 | RPPA cluster |
| 14 | Mutation process cluster |
| 15 | SMG SCNA cluster |
| 16 | mutation in TP53 |
| 17 | mutation in RB1 |
| 18 | mutation in RHOB |
| 19 | mutation in PIK3CA |
| 20 | mutation in KDM6A |
| 21 | mutation in TSC1 |
| 22 | mutation in ELF3 |
| 23 | mutation in KMT2D |
| 24 | mutation in CREBBP |
| 25 | mutation in CDKN1A |
| 26 | mutation in EP300 |
| 27 | mutation in ZFP36L1 |
| 28 | mutation in ARID1A |
| 29 | mutation in STAG2 |
| 30 | mutation in CDKN2A |
| 31 | mutation in HRAS |
| 32 | mutation in KRAS |
| 33 | mutation in FBXW7 |
| 34 | mutation in ERCC2 |
| 35 | mutation in ASXL2 |
| 36 | mutation in RHOA |
| 37 | mutation in KMT2A |
| 38 | mutation in FGFR3 |
| 39 | mutation in NFE2L2 |
| 40 | mutation in KMT2C |
| 41 | mutation in PSIP1 |
| 42 | mutation in KANSL1 |
| 43 | mutation in C3orf70 |
| 44 | mutation in FAT1 |
| 45 | mutation in SPTAN1 |
| 46 | mutation in RXRA |
| 47 | mutation in ZBTB7B |
| 48 | mutation in PTEN |
| 49 | mutation in ATM |
| 50 | mutation in KLF5 |
| 51 | mutation in PARD3 |
| 52 | mutation in CUL1 |
| 53 | mutation in NRAS |
| 54 | mutation in SF3B1 |
| 55 | mutation in GNA13 |
| 56 | mutation in RBM10 |
| 57 | mutation in ACTB |
| 58 | mutation in MBD1 |
| 59 | mutation in CASP8 |
| 60 | mutation in HIST1H3B |
| 61 | mutation in TAF11 |
| 62 | mutation in ERBB2 |
| 63 | mutation in NUP93 |
| 64 | mutation in SF1 |
| 65 | mutation in ERBB3 |
| 66 | mutation in METTL3 |
| 67 | mutation in SPN |
| 68 | mutation in MB21D2 |
| 69 | mutation in SSH3 |
| 70 | mutation in USP28 |
| 71 | mutation in ASXL1 |
| 72 | mutation in TMCO4 |
| 73 | mutation in HES1 |
| 74 | mutation in ZNF773 |
| 75 | total number Single Nucleotide Variants |
| 76 | total number Indels |
| 77 | NMF based count C T_CpG mutations |
| 78 | NMF based count ERCC2 mutations |
| 79 | NMF based count APOBEC b mutations |
| 80 | NMF based count APOBEC a mutations |
| 81 | NMF based fraction C T_CpG mutations |
| 82 | NMF based fraction ERCC2 mutations |
| 83 | NMF based fraction APOBEC b mutations |
| 84 | NMF based fraction APOBEC a mutations |
| 85 | APOBEC induced mutation load PMACD |
| 86 | APOBEC mutation load tertile |
| 87 | ABSOLUTE call status |
| 88 | Tumor purity from ABSOLUTE |
| 89 | Tumor ploidy from ABSOLUTE |
| 90 | Genome doublings from ABSOLUTE |
| 91 | Cancer DNA fraction from ABSOLUTE |
| 92 | Subclonal genome fraction from ABSOLUTE |
| 93 | focal amplification in E2F3.SOX4 |
| 94 | focal amplification in PVRL4 |
| 95 | focal amplification in YWHAZ |
| 96 | focal amplification in CCND1 |
| 97 | focal amplification in PPARG |
| 98 | focal amplification in MDM2 |
| 99 | focal amplification in GATA3 |
| 100 | focal amplification in ZNF703 |
| 101 | focal amplification in CCNE1 |
| 102 | focal amplification in MYCL1 |
| 103 | focal amplification in BCL2L1 |
| 104 | focal amplification in TERT |
| 105 | focal amplification in ERBB2 |
| 106 | focal amplification in MCL1 |
| 107 | focal amplification in EGFR |
| 108 | focal amplification in AHR |
| 109 | focal amplification in JAK2 |
| 110 | focal amplification in FGFR3 |
| 111 | focal amplification in KRAS |
| 112 | focal deletion in CDKN2A |
| 113 | focal deletion in RB1 |
| 114 | focal deletion in PDE4D |
| 115 | focal deletion in CCSER1 |
| 116 | focal deletion in CREBBP |
| 117 | focal deletion in WWOX |
| 118 | focal deletion in LRP1B |
| 119 | focal deletion in PTEN |
| 120 | focal deletion in ARID1A |
| 121 | focal deletion in NCOR1 |
| 122 | focal deletion in RAD51B |
| 123 | focal deletion in FHIT |
| 124 | focal deletion in PTPRD |
| 125 | focal deletion in KDM6A |
| 126 | Neoantigen load |
| 127 | HLA mutation |
| 128 | Fusion in FGFR3 |
| 129 | Fusion in PPARG |
| 130 | Fusion in PTPN13 |
| 131 | Fusion in RHOA |
| 132 | Fusion in TNFRSF21 |
| 133 | Fusion in ASIP |

# microRNA cluster

| Subtype | OR | CI 95% (lower) | CI 95% (upper) | Fisher test | Rank | B-H critical value | Significance |
| --- | --- | --- | --- | --- | --- | --- | --- |
| 3 | 0.4891673 | 0.30949848 | 0.7675367 | 0.001237183 | 1 | 0.04 | * |
| 1 | 1.7112831 | 1.00492709 | 2.9496735 | 0.042928036 | 2 | 0.08 | * |
| ND | 0.3243834 | 0.03166642 | 1.8416907 | 0.173849383 | 3 | 0.12 | nc |
| 2 | 1.3007998 | 0.83483947 | 2.0323424 | 0.238318513 | 4 | 0.16 | nc |
| 4 | 1.2302360 | 0.73087070 | 2.0801078 | 0.453396719 | 5 | 0.20 | nc |

# mutation in TSC1

| Status | OR | CI 95% (lower) | CI 95% (upper) | Fisher test | Rank | B-H critical value | Significance |
| --- | --- | --- | --- | --- | --- | --- | --- |
| WT | 2.811912 | 1.3106471 | 6.4519114 | 0.004093058 | 1 | 0.1 | * |
| MUT | 0.355630 | 0.1549928 | 0.7629819 | 0.004093058 | 2 | 0.2 | * |

# mRNA cluster

| Subtype | OR | CI 95% (lower) | CI 95% (upper) | Fisher test | Rank | B-H critical value | Significance |
| --- | --- | --- | --- | --- | --- | --- | --- |
| Luminal_papillary | 0.5503452 | 0.356269439 | 0.8460994 | 0.005136399 | 1 | 0.03333333 | * |
| Basal_squamous | 1.7430838 | 1.129631392 | 2.7027458 | 0.009110960 | 2 | 0.06666667 | * |
| Neuronal | 2.1968868 | 0.919444565 | 5.6586275 | 0.076581201 | 3 | 0.10000000 | * |
| ND | 0.3276581 | 0.006201882 | 4.1192275 | 0.370745811 | 4 | 0.13333333 | nc |
| Luminal_infiltrated | 0.8143632 | 0.477874711 | 1.3820029 | 0.447574880 | 5 | 0.16666667 | nc |
| Luminal | 1.0850770 | 0.426822692 | 2.7858274 | 1.000000000 | 6 | 0.20000000 | nc |

# mutation in FGFR3

| Status | OR | CI 95% (lower) | CI 95% (upper) | Fisher test | Rank | B-H critical value | Significance |
| --- | --- | --- | --- | --- | --- | --- | --- |
| WT | 2.0577819 | 1.1532480 | 3.7485316 | 0.01016707 | 1 | 0.1 | * |
| MUT | 0.4859601 | 0.2667711 | 0.8671162 | 0.01016707 | 2 | 0.2 | * |

#

# lncRNA cluster

| Subtype | OR | CI 95% (lower) | CI 95% (upper) | Fisher test | Rank | B-H critical value | Significance |
| --- | --- | --- | --- | --- | --- | --- | --- |
| 3 | 0.4837417 | 0.2739837 | 0.8391926 | 0.006654241 | 1 | 0.04 | * |
| 4 | 1.7092592 | 1.1165815 | 2.6275041 | 0.010342543 | 2 | 0.08 | * |
| 2 | 0.7905216 | 0.4981848 | 1.2510181 | 0.318221280 | 3 | 0.12 | nc |
| 1 | 1.2093942 | 0.7041715 | 2.0869989 | 0.517195051 | 4 | 0.16 | nc |
| ND | 0.9901708 | 0.1817876 | 5.3932136 | 1.000000000 | 5 | 0.20 | nc |

# mutation in ERBB3

| Status | OR | CI 95% (lower) | CI 95% (upper) | Fisher test | Rank | B-H critical value | Significance |
| --- | --- | --- | --- | --- | --- | --- | --- |
| WT | 2.1902027 | 1.0990852 | 4.5361162 | 0.01792408 | 1 | 0.1 | * |
| MUT | 0.4565787 | 0.2204529 | 0.9098476 | 0.01792408 | 2 | 0.2 | * |

# mutation in FAT1

| Status | OR | CI 95% (lower) | CI 95% (upper) | Fisher test | Rank | B-H critical value | Significance |
| --- | --- | --- | --- | --- | --- | --- | --- |
| WT | 0.5339163 | 0.2977397 | 0.9413875 | 0.02328952 | 1 | 0.1 | * |
| MUT | 1.8729526 | 1.0622618 | 3.3586387 | 0.02328952 | 2 | 0.2 | * |

# mutation in PIK3CA

| Status | OR | CI 95% (lower) | CI 95% (upper) | Fisher test | Rank | B-H critical value | Significance |
| --- | --- | --- | --- | --- | --- | --- | --- |
| WT | 0.6035109 | 0.3680987 | 0.9818816 | 0.03596012 | 1 | 0.1 | * |
| MUT | 1.6569708 | 1.0184528 | 2.7166623 | 0.03596012 | 2 | 0.2 | * |

# mutation in KANSL1

| Status | OR | CI 95% (lower) | CI 95% (upper) | Fisher test | Rank | B-H critical value | Significance |
| --- | --- | --- | --- | --- | --- | --- | --- |
| WT | 2.0690776 | 0.9841384 | 4.546840 | 0.04184239 | 1 | 0.1 | * |
| MUT | 0.4833072 | 0.2199330 | 1.016117 | 0.04184239 | 2 | 0.2 | * |

# mutation in TMCO4

| Status | OR | CI 95% (lower) | CI 95% (upper) | Fisher test | Rank | B-H critical value | Significance |
| --- | --- | --- | --- | --- | --- | --- | --- |
| WT | 4.6910592 | 0.95414097 | 45.155757 | 0.03543734 | 1 | 0.1 | * |
| MUT | 0.2131715 | 0.02214557 | 1.048063 | 0.03543734 | 2 | 0.2 | * |

# mutation in KDM6A

| Status | OR | CI 95% (lower) | CI 95% (upper) | Fisher test | Rank | B-H critical value | Significance |
| --- | --- | --- | --- | --- | --- | --- | --- |
| WT | 1.5842404 | 1.011445 | 2.4934236 | 0.03981648 | 1 | 0.1 | * |
| MUT | 0.6312173 | 0.401055 | 0.9886841 | 0.03981648 | 2 | 0.2 | * |

# mutation in METTL3

| Status | OR | CI 95% (lower) | CI 95% (upper) | Fisher test | Rank | B-H critical value | Significance |
| --- | --- | --- | --- | --- | --- | --- | --- |
| WT | 3.477753 | 0.87812271 | 19.952959 | 0.05269398 | 1 | 0.1 | * |
| MUT | 0.287542 | 0.05011788 | 1.138793 | 0.05269398 | 2 | 0.2 | * |

# Squamous pathology

| Existence status | OR | CI 95% (lower) | CI 95% (upper) | Fisher test | Rank | B-H critical value | Significance |
| --- | --- | --- | --- | --- | --- | --- | --- |
| Absent | 0.5472881 | 0.2776081 | 1.051119 | 0.06712539 | 1 | 0.1 | * |
| Present | 1.8271912 | 0.9513669 | 3.602200 | 0.06712539 | 2 | 0.2 | * |

# mutation in PSIP1

| Status | OR | CI 95% (lower) | CI 95% (upper) | Fisher test | Rank | B-H critical value | Significance |
| --- | --- | --- | --- | --- | --- | --- | --- |
| WT | 2.450398 | 0.8629208 | 7.944669 | 0.07018782 | 1 | 0.1 | * |
| MUT | 0.408097 | 0.1258706 | 1.158855 | 0.07018782 | 2 | 0.2 | * |

# mutation in ZNF773

| Status | OR | CI 95% (lower) | CI 95% (upper) | Fisher test | Rank | B-H critical value | Significance |
| --- | --- | --- | --- | --- | --- | --- | --- |
| WT | 3.1145202 | 0.76275902 | 18.14406 | 0.08645945 | 1 | 0.1 | * |
| MUT | 0.3210767 | 0.05511445 | 1.31103 | 0.08645945 | 2 | 0.2 | * |

# Hypomethylation cluster

| Subtype | OR | CI 95% (lower) | CI 95% (upper) | Fisher test | Rank | B-H critical value | Significance |
| --- | --- | --- | --- | --- | --- | --- | --- |
| 4 | 0.4449481 | 0.1901593 | 0.9818698 | 0.03231970 | 1 | 0.04 | * |
| 2 | 1.6759930 | 0.9604561 | 2.9648401 | 0.06443676 | 2 | 0.08 | * |
| 3 | 0.8040387 | 0.4627858 | 1.3899148 | 0.43307045 | 3 | 0.12 | nc |
| 1 | 1.1131818 | 0.7338594 | 1.6899079 | 0.61356526 | 4 | 0.16 | nc |
| 5 | 0.9581662 | 0.5717707 | 1.6047348 | 0.90168307 | 5 | 0.20 | nc |

# mutation in GNA13

| Status | OR | CI 95% (lower) | CI 95% (upper) | Fisher test | Rank | B-H critical value | Significance |
| --- | --- | --- | --- | --- | --- | --- | --- |
| WT | 2.5065931 | 0.8034681 | 9.257219 | 0.08828155 | 1 | 0.1 | * |
| MUT | 0.3989479 | 0.1080238 | 1.244604 | 0.08828155 | 2 | 0.2 | * |
